# Supplementary material for: Fabrication of curcumin-loaded folic acid-tagged metal organic framework for triple negative breast cancer therapy inin vitroandin vivosystems
Source: Royal Society of Chemistry journal article supplement (doi:10.1039/c8nj03350a), 2018-11-08
Supplement: c8nj03350a1.pdf [file c8nj03350a1.pdf]

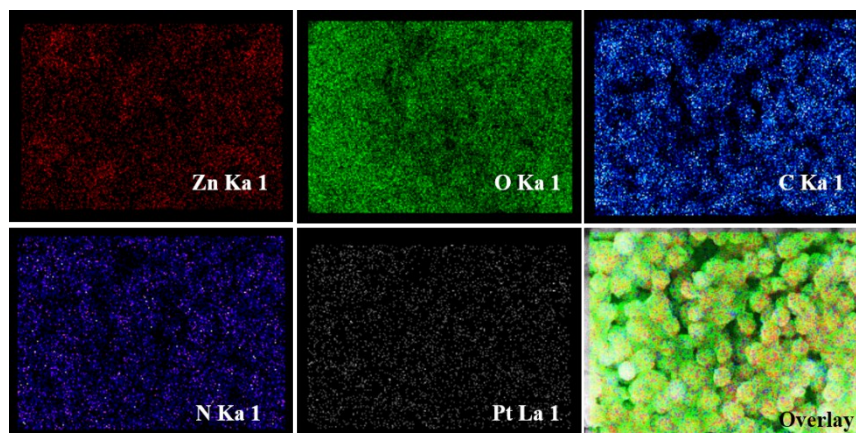

Supplementary Figure 1. Elemental mapping analysis of IRMOF-3@CCM@FA.

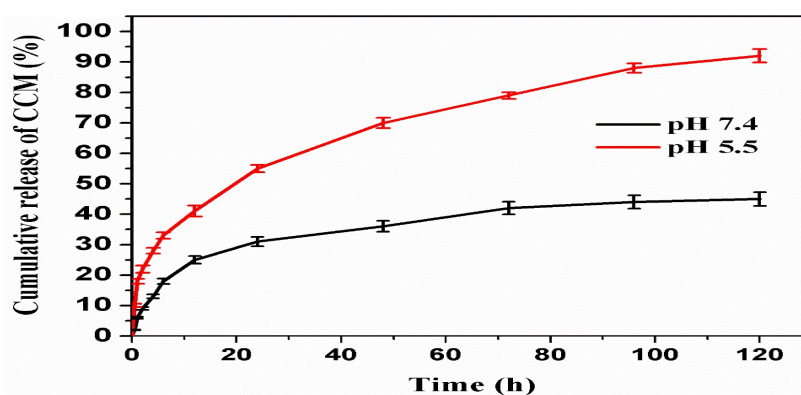

Supplementary Figure 2. Invitro drug release study at different pH.

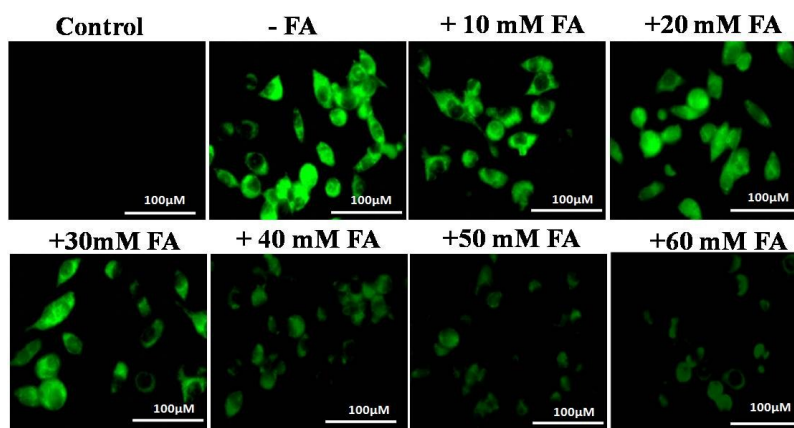

Supplementary Figure 3. MDA MB-468 cells were treated with IRMOF-3@CCM@FA in presence or absence of Folic acid. Fluorescence microscopic image were taken by fluorescence microscopy,
